# Supplementary material for: Synergistic catalytic action of vanadia–titania composites towards the microwave-assisted benzoin oxidation
Source: Royal Society of Chemistry journal article supplement (doi:10.1039/c8dt04274h), 2019-01-01
Supplement: c8dt04274h1.pdf [file c8dt04274h1.pdf]

## Supplementary Information

### Synergistic catalytic action of vanadia-titania composites towards the microwave-assisted benzoin oxidation

Francesco Ferretti,<sup>a,d</sup> Ana P.C. Ribeiro,<sup>a</sup> Elisabete C.B.A. Alegria,<sup>a,b\*</sup> Ana M. Ferraria,<sup>c</sup> Maximilian N. Kopylovich,<sup>a\*</sup> M. Fátima C. Guedes da Silva,<sup>a</sup> Fabio Marchetti,<sup>d</sup> Armando J.L. Pombeiro<sup>a\*</sup>

<sup>a</sup>Centro de Química Estrutural, Complexo I, Instituto Superior Técnico, Universidade de Lisboa, 1049-001 Lisboa, Portugal.

<sup>b</sup>Chemical Engineering Department, Instituto Superior de Engenharia de Lisboa, Instituto Politécnico de Lisboa, 1959-007 Lisboa, Portugal.

<sup>c</sup>CQFM-Centro de Química-Física Molecular and IN and IBB-Institute for Bioengineering and Biosciences, Instituto Superior Técnico, Universidade de Lisboa, 1049-001 Lisboa, Portugal.

<sup>d</sup>School of Science and Technology, Chemistry Section, University of Camerino, Via S. Agostino 1, 62032 Camerino, Italy.

Email: [ebastos@deq.isel.ipl.pt](mailto:ebastos@deq.isel.ipl.pt), [maximilian.kopylovich@tecnico.ulisboa.pt](mailto:maximilian.kopylovich@tecnico.ulisboa.pt), [pombeiro@tecnico.ulisboa.pt](mailto:pombeiro@tecnico.ulisboa.pt)

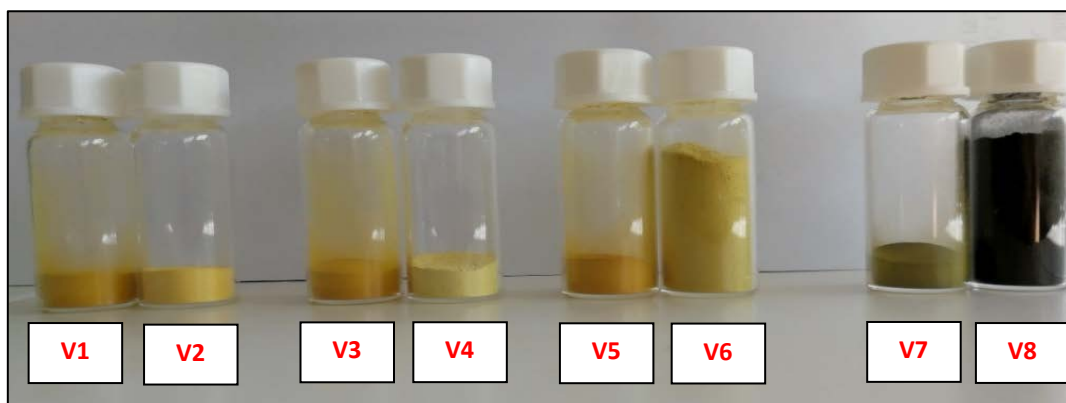

Fig. S1. Vanadium-based composites **V1** [ $\text{V}_2\text{O}_5$ - $\text{TiO}_2$  (95:5)]; **V2** [ $\text{V}_2\text{O}_5$ - $\text{TiO}_2$  (5:95)]; **V3** [ $\text{V}_2\text{O}_5$ - $\text{Al}_2\text{O}_3$  (95:5)]; **V4** [ $\text{V}_2\text{O}_5$ - $\text{Al}_2\text{O}_3$  (5:95)]; **V5** [ $\text{V}_2\text{O}_5$ - $\text{SiO}_2$  (95:5)]; **V6** [ $\text{V}_2\text{O}_5$ - $\text{SiO}_2$  (5:95)]; **V7** [ $\text{V}_2\text{O}_5$ -AC (95:5)]; **V8** [ $\text{V}_2\text{O}_5$ -AC (5:95)].

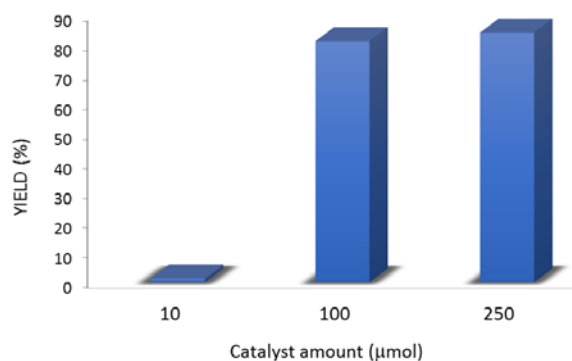

Fig. S2. Dependence of benzil yield on the catalyst amount catalysed by the  $\text{V}_2\text{O}_5$ - $\text{TiO}_2$  (95:5) mixture.

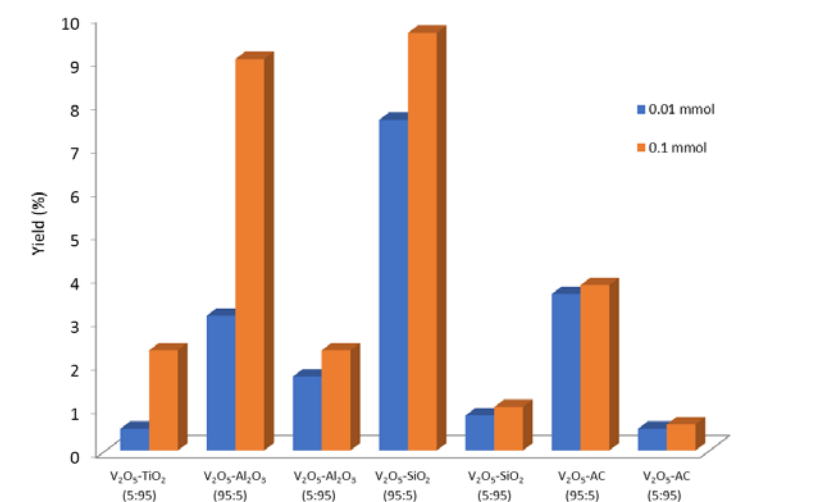

Fig. S3. Dependence of benzil yield on the catalyst amount catalysed by different composites.

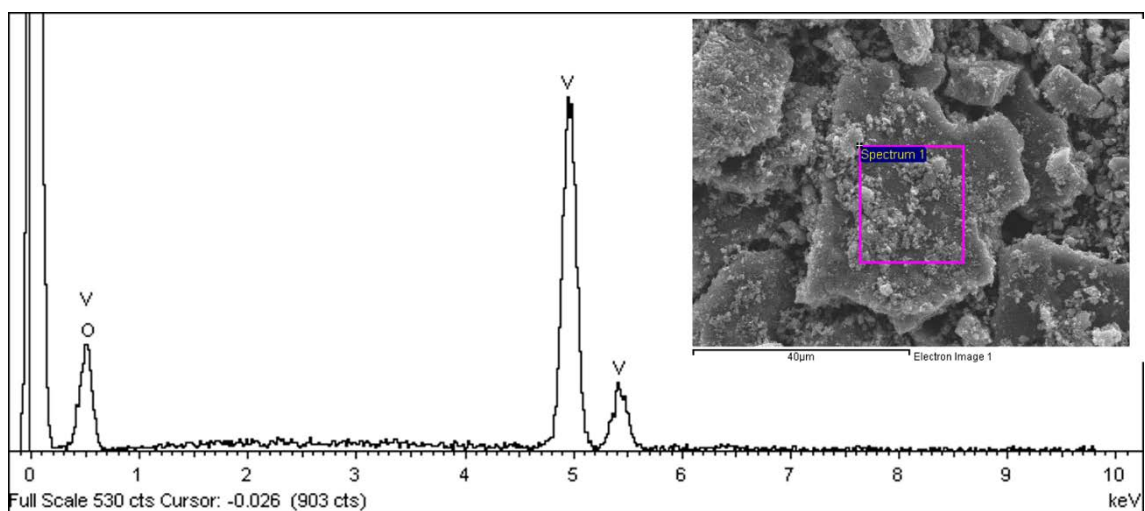

Fig. S4. SEM image and EDX analysis of starting  $V_2O_5$ .

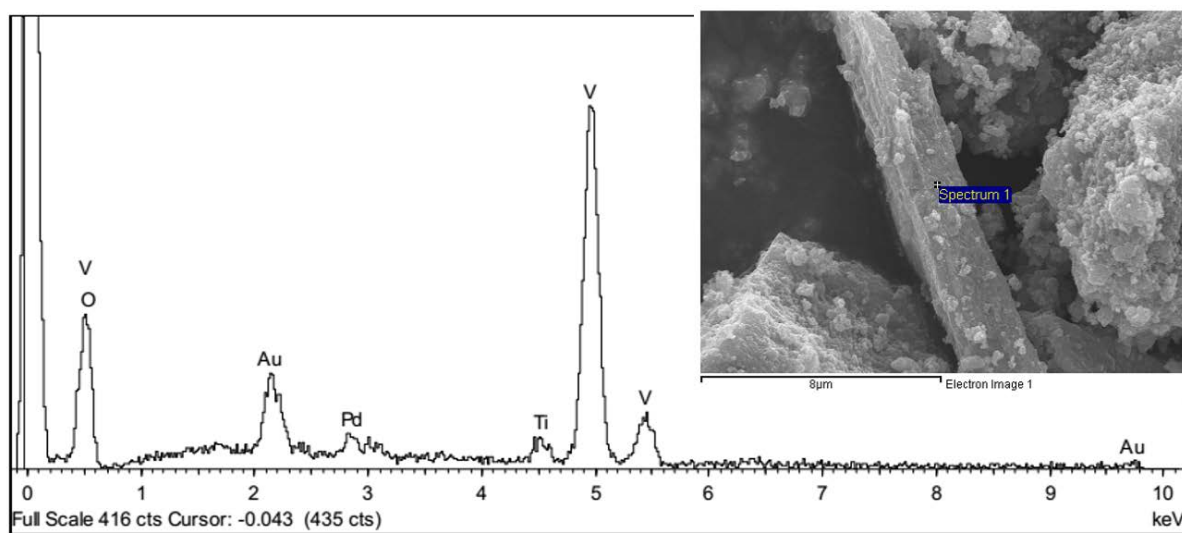

Fig. S5. EDX image of  $V_2O_5$ - $TiO_2$  (95:5) composite.
